# Supplementary material
Source: PubMed Central journal article supplement (PMC2048695)
Supplement: plntcell_tpc.107.050997_1.pdf [file plntcell_tpc.107.050997_1.pdf]

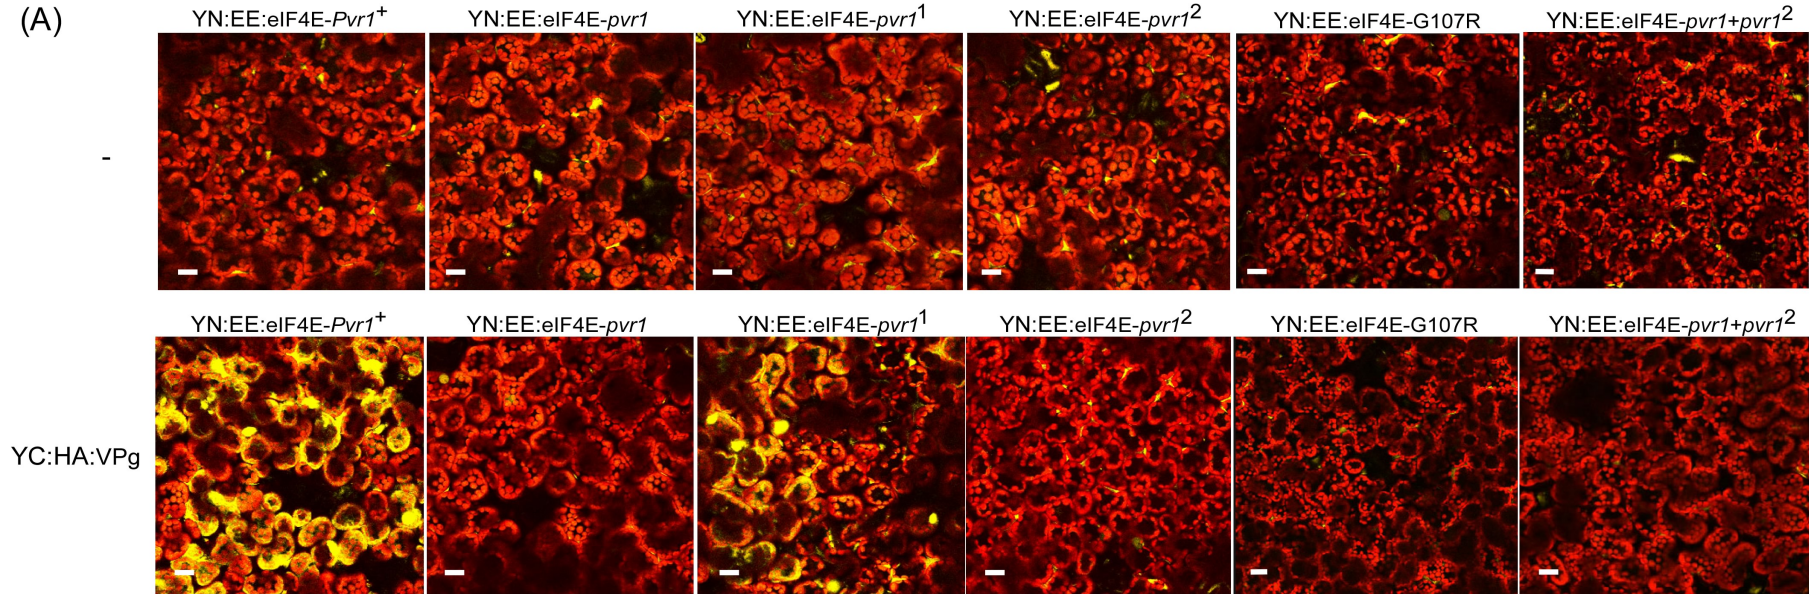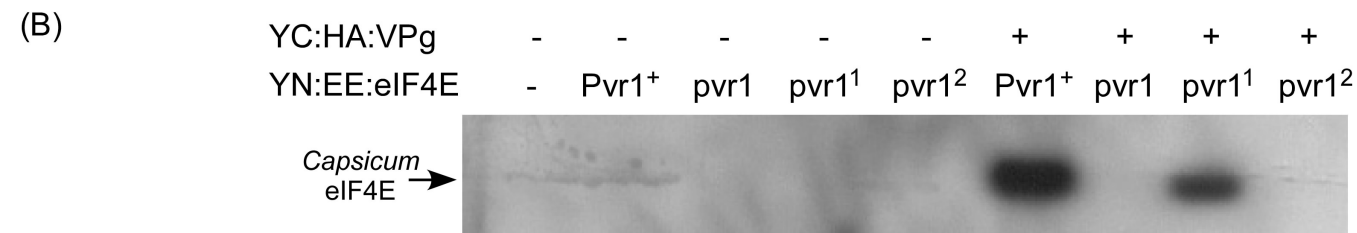

### Supplemental Figure 1

Confocal microscope images from bimolecular fluorescence complementation assay (BiFC) using *Agrobacterium*-mediated transient expression assay in *N. benthamiana*.

(A) eIF4E proteins fused with YN; YN:EE:eIF4E-*Pvr1*<sup>+</sup>, YN:EE:eIF4E-*pvr1* YN:EE:eIF4E-*pvr1*<sup>1</sup> YN:EE:eIF4E-*pvr1*<sup>2</sup>, YN:EE:eIF4E-G107R, YN:EE:eIF4E-*pvr1*<sup>1</sup>+*pvr1*<sup>2</sup>, were transiently expressed in *N. benthamiana* leaf tissue with and without VPg protein fused with YC; YN:HA:VPg (TEV-HAT). Yellow fluorescent signal generated by the protein-protein interaction were detected in mesophyll cells 60 hours post-infiltration. Chloroplast autofluorescence is shown in red. Scale bar = 10 micron.

(B) Immunoblot image from coimmunoprecipitation assays. Total protein extracts were pulled down with anti-HA agarose beads and immunoblotted with an antibody for *Capsicum*-eIF4E.

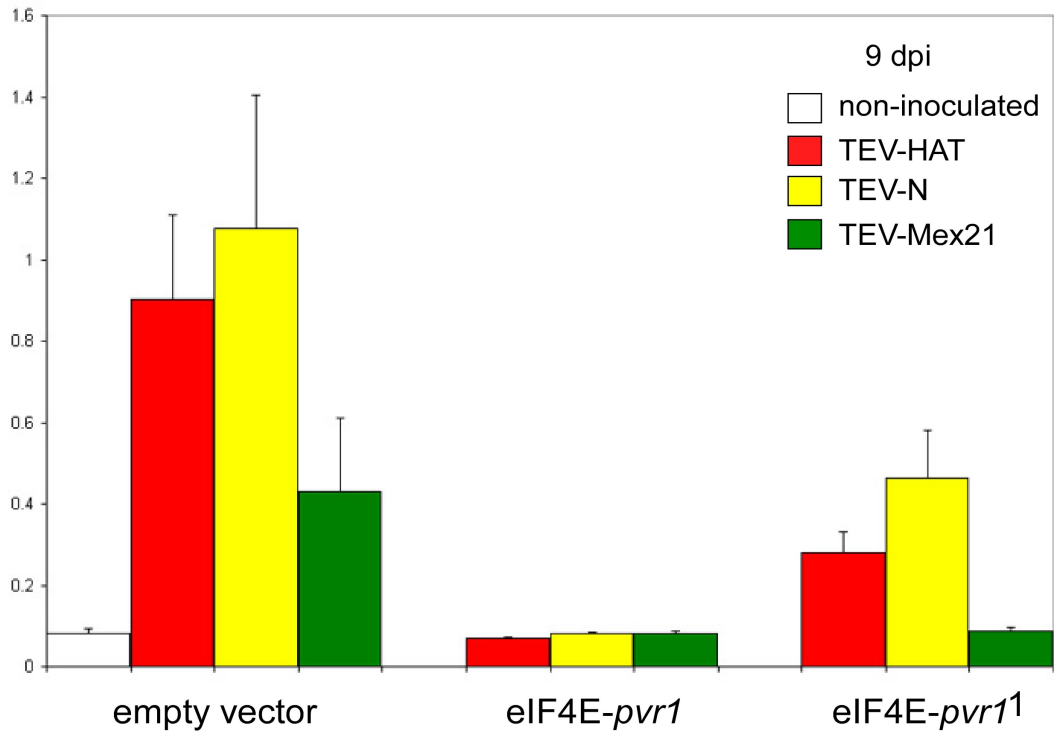

Supplemental Figure 2

Accumulation of TEV coat protein determined by ELISA for transgenic tomatoes containing empty vector, eIF4E-*pvr1*, or eIF4E-*pvr1*<sup>1</sup>.

ELISA was performed for T2 plants containing empty vector, eIF4E-*pvr1*, or eIF4E-*pvr1*<sup>1</sup>, 9 days after inoculating with TEV-HAT, TEV-N and TEV-Mex21. Accumulation of TEV coat protein determined by ELISA of tissue sampled from upper un-inoculated leaves at 9 dpi.

**Supplemental Table 1.** Primer sequences used for site-directed mutagenesis.

| Primer name  | Sequence (5' → 3')                                |
|--------------|---------------------------------------------------|
| T51Af        | caa aga aat agc <b>agc</b> aaa gca tcc at         |
| T51Ar        | at gga tgc ttt gct <b>gct</b> att tct ttg         |
| P66Tf        | ctg gtt tga taa <b>ta</b> c agt ggc gaa atc       |
| P66Tr        | gat ttc gcc act <b>gta</b> tta tca aac cag        |
| G107Rf       | gca agt tag ttg <b>tga</b> gag cag act tac attg   |
| G107Rr       | caa tgt aag tct gct <b>ctc</b> aca act aac ttgc   |
| V67Ef        | ctg gtt tga taa tcc <b>aga</b> ggc gaa atc gaaac  |
| V67Er        | gtt tgc att tgc <b>cct</b> ctg gat tat caa accag  |
| L79Rf        | ggg tag ctc <b>gcg</b> tgc caa cgt cta cac        |
| L79Rr        | gtg tag acg ttg cga <b>cgc</b> gag cta ccc        |
| D109Nf       | gtt agt tgt ggg agc <b>aaa</b> ctt aca ttg        |
| D109Nr       | caa tgt aac <b>ttt</b> gct ccc aca act aac        |
| G107R_D109Nf | gtt agt tgt <b>gag</b> agc <b>aaa</b> ctt aca ttg |
| G107R_D109Nr | caa tgt aac <b>ttt</b> gct <b>ctc</b> aca act aac |
| P66T_L79Rf   | ggt ttg ata <b>ata</b> cag <b>agg</b> cga aat cg  |
| P66T_L79Rr   | cga ttt cgc <b>ctc</b> tgt <b>ttt</b> atc aaa cc  |

**Supplemental Table 2.** Primers sequences used for various plasmid construction.

| Primer name           | Primer sequence (5' → 3')       | Cloning vector |
|-----------------------|---------------------------------|----------------|
| VPgMex-xr             | ccctcgagctattcaaacatcaactcct    | pEG202/pJG4-5  |
| VPgNW-xr              | ccctcgagctattcaaacgtcaactcct    | pEG202/pJG4-5  |
| eIF4E-sf              | ccgagctcatggcaacagctgaaatgg     | pSY735/pSY736  |
| eIF4E-br              | tccggatccctatacgggtgaacg        | pSY735/pSY736  |
| VPgHAT-sf             | gagctcatggggaagaagaatcagaa      | pSY735/pSY736  |
| VPgMex-sf             | gagctcatggggaagaagaatcag aa     | pSY735/pSY736  |
| VPgMex-bsr            | ggatccactattcaaacatcaactcct     | pSY735/pSY736  |
| VPgNNW-bsr            | ggatccactattcaaacgtcaactcct     | pSY735/pSY736  |
| VPgHAT-bsr            | ggatccactattcaaacgtcaactcct     | pSY735/pSY736  |
| VPgHAT-BamHIeraserF   | cattaggtttgtggaccattgacaggtcac  | pSY735/pSY736  |
| VPgHAT-BamHIeraserR   | gtgacctgtcaatgggtccacaaacctaatg | pSY735/pSY736  |
| VPgHAT-HindIIIeraserF | cagaagcacaagctgaagatgagagaggcg  | pCAMBIA        |
| VPgHAT-HindIIIeraserR | cgcctctctcatcttcagcttgctctctg   | pCAMBIA        |
| eIF4E_SmaI F          | tccccgggatggcaacagctgaaatgg     | pBI121         |
| eIF4E_SacIR           | tccgagctctatacgggtgaacg         | pBI121         |
